# Supplementary material for: Tryptophan Hydroxylase-2-Mediated Serotonin Biosynthesis Suppresses Cell Reprogramming into Pluripotent State
Source: MDPI journal article supplement (doi:10.3390/ijms24054862), 2023-03-02
Supplement: s1 [file s1]

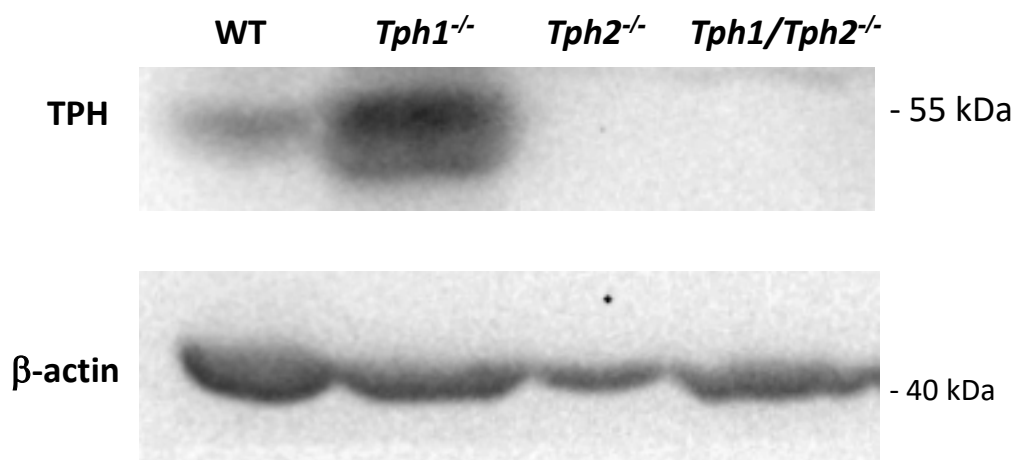

**Supplementary Figure S1. *Tph2*<sup>-/-</sup> and *Tph1/Tph2*<sup>-/-</sup> knockout iPSCs do not express TPH proteins. *Tph1*<sup>-/-</sup> iPSCs express excess of TPH2.** Representative immunoblotting of iPSCs lysates from WT and *Tph*-knockouts with pan-TPH antibodies and beta-actin antibodies as loading control.

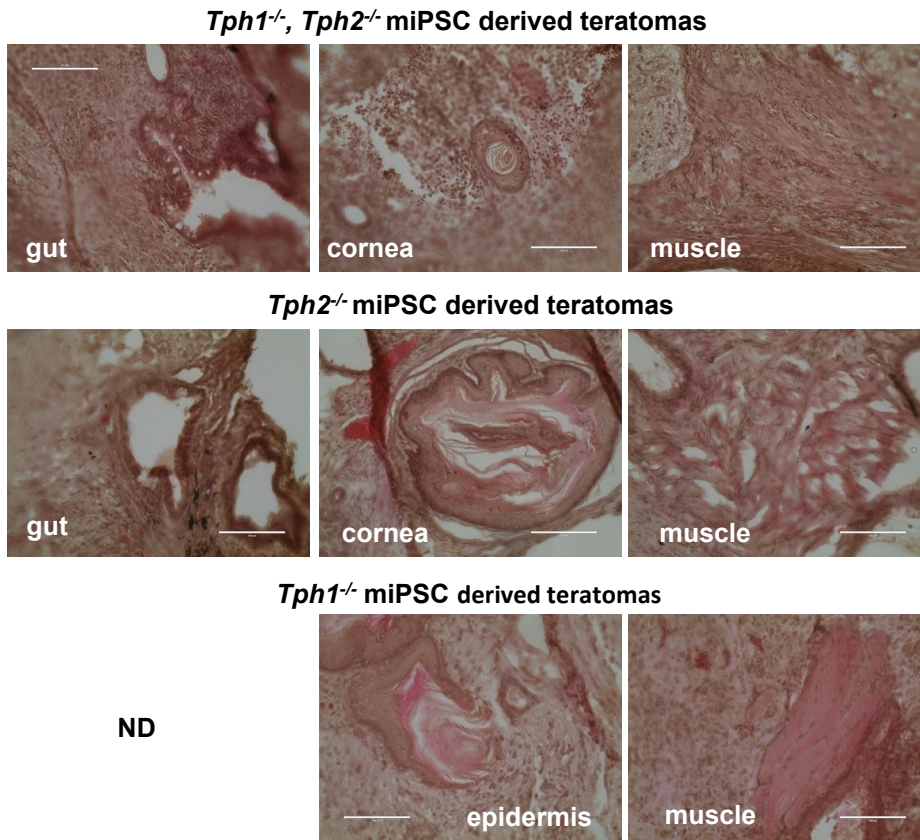

**Supplementary Figure 2. iPSCs lacking TPH enzymes develop teratomas with all three embryonic germ layers.** *Tph1*/*Tph2*<sup>-/-</sup> and *Tph2*<sup>-/-</sup> teratomas showed development of gut, cornea and muscle tissues representing endoderm, ectoderm and mesoderm germ layers, respectively. In *Tph1*<sup>-/-</sup> iPSC-derived teratomas the ectodermal tissues were not determined (ND).

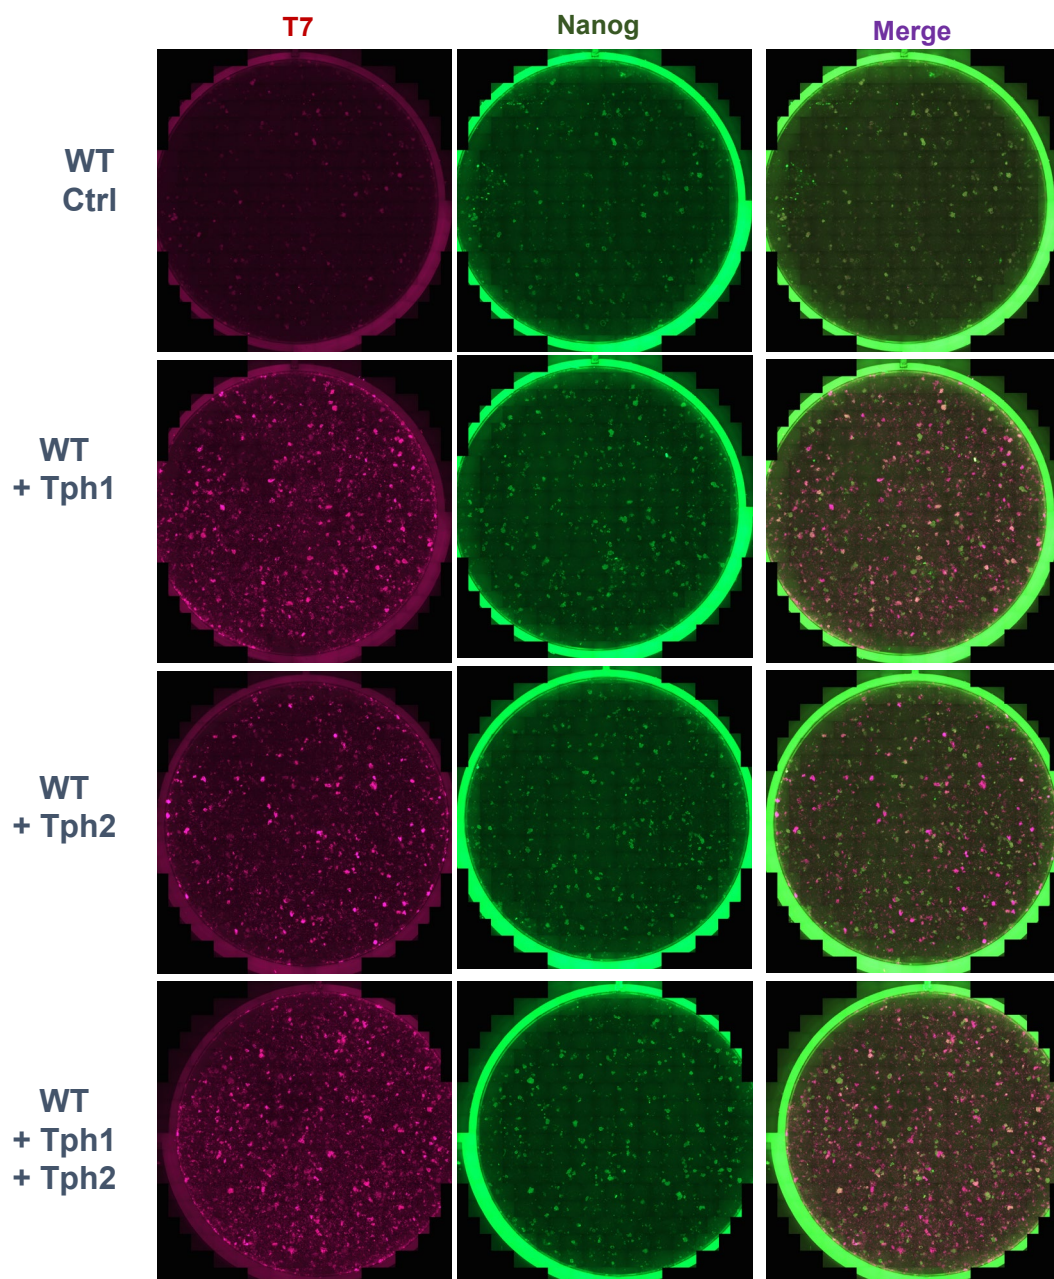

**Supplementary Figure 3. Overexpression of Tph1 и Tph2 during OKSM reprogramming improves the efficiency of iPSC generation.** Representative immunostainings of WT iPSCs clones after 14 days of OKSM-reprogramming in conditions of continuous overexpression of Tph1 or Tph2 or both with anti- T7-epitope and -Nanog antibodies.



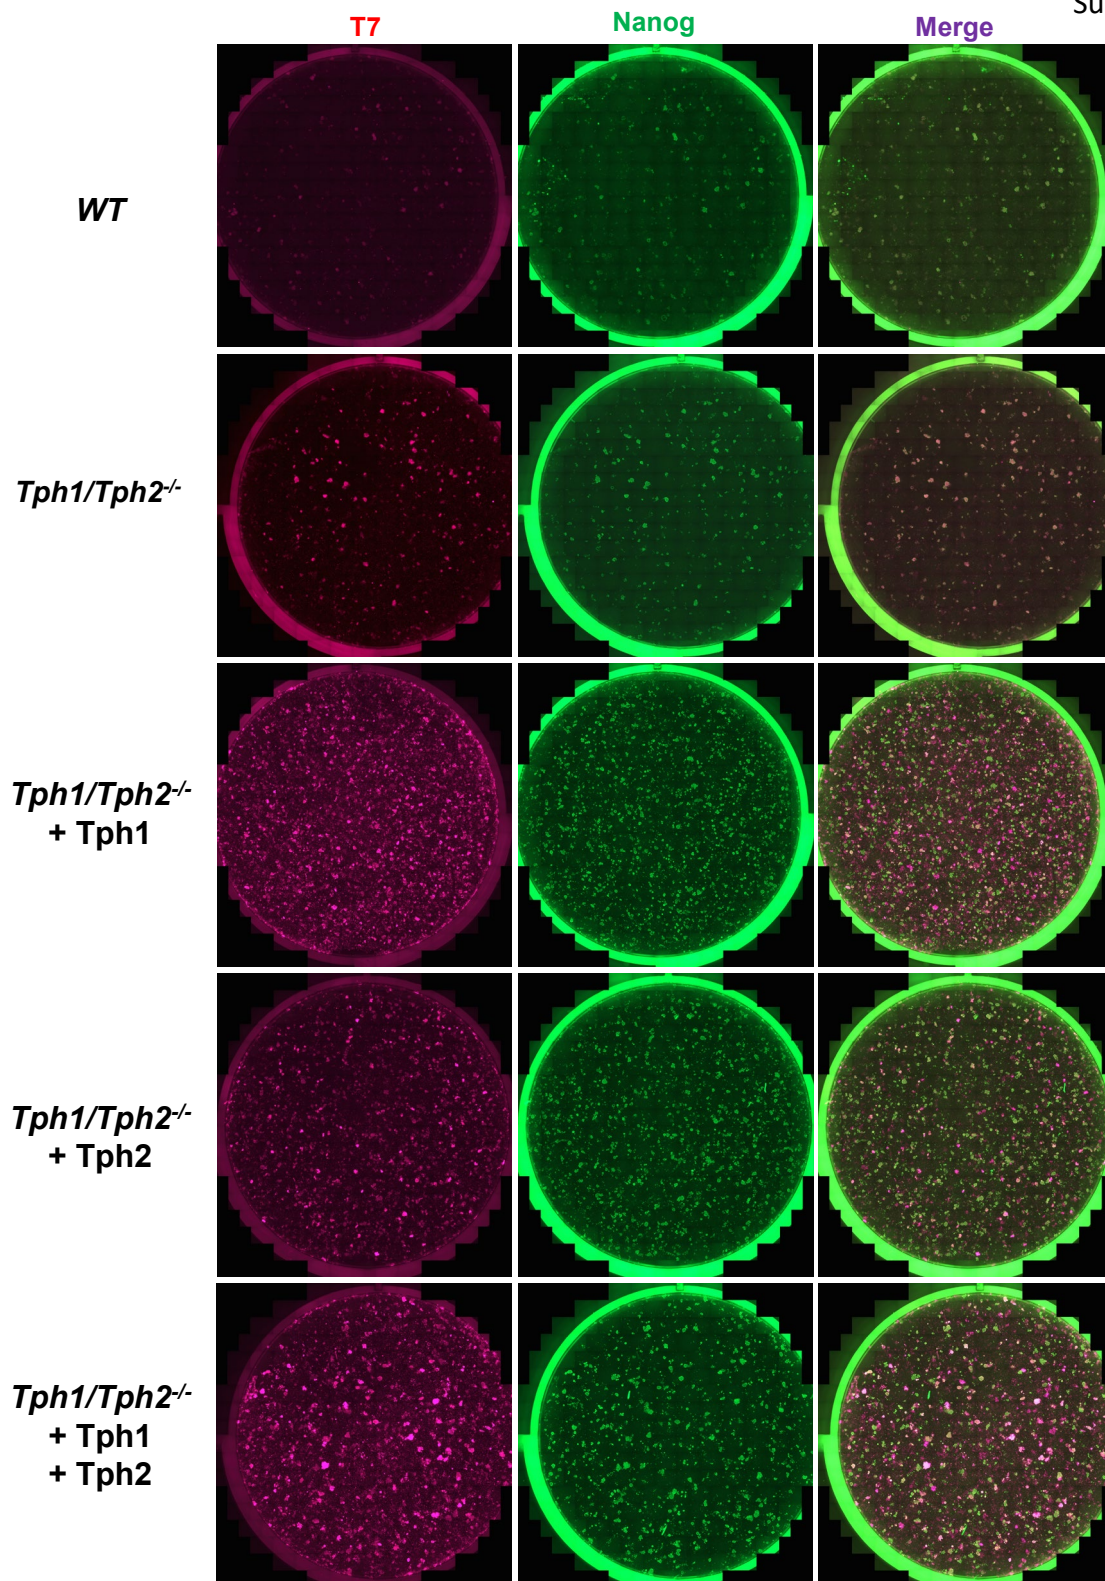

**Supplementary Figure 4. Tph2 overexpression rescues the *Tph1/Tph2*<sup>-/-</sup> phenotype.**

Representative immunostainings of *Tph1/Tph2*<sup>-/-</sup> iPSC clones after 14 days of OKSM-reprogramming in conditions of continuous overexpression of Tph1 or Tph2 or both with anti-T7-epitope and Nanog antibodies.

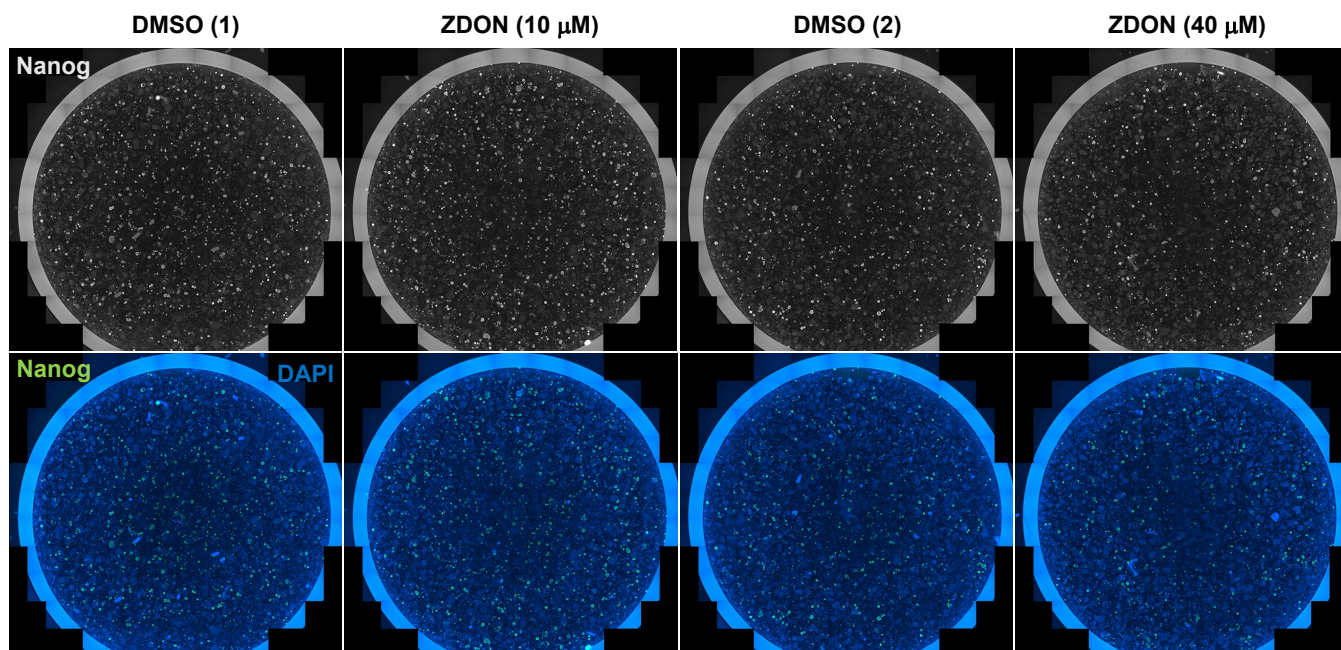

**Supplementary Figure 5. Inhibiting serotonylation by 10  $\mu$ M ZDON does not affect the reprogramming efficiency of WT MEFs.** Representative immunostainings of WT iPSCs clones after 14 days of OKSM-reprogramming and continuous treatment with ZDON (10 and 40  $\mu$ M) with anti-Nanog antibodies.

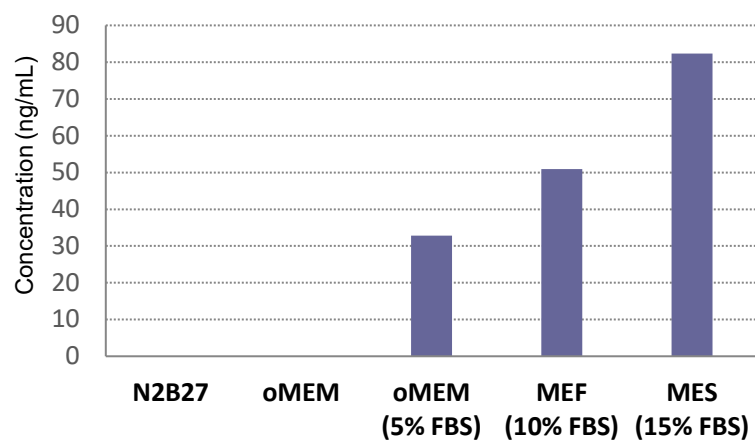

**Supplementary Figure 6. Serotonin content in the cell culture media depends on the serum concentration.** HPLC-based detection of serotonin in different culture media used for cell reprogramming.



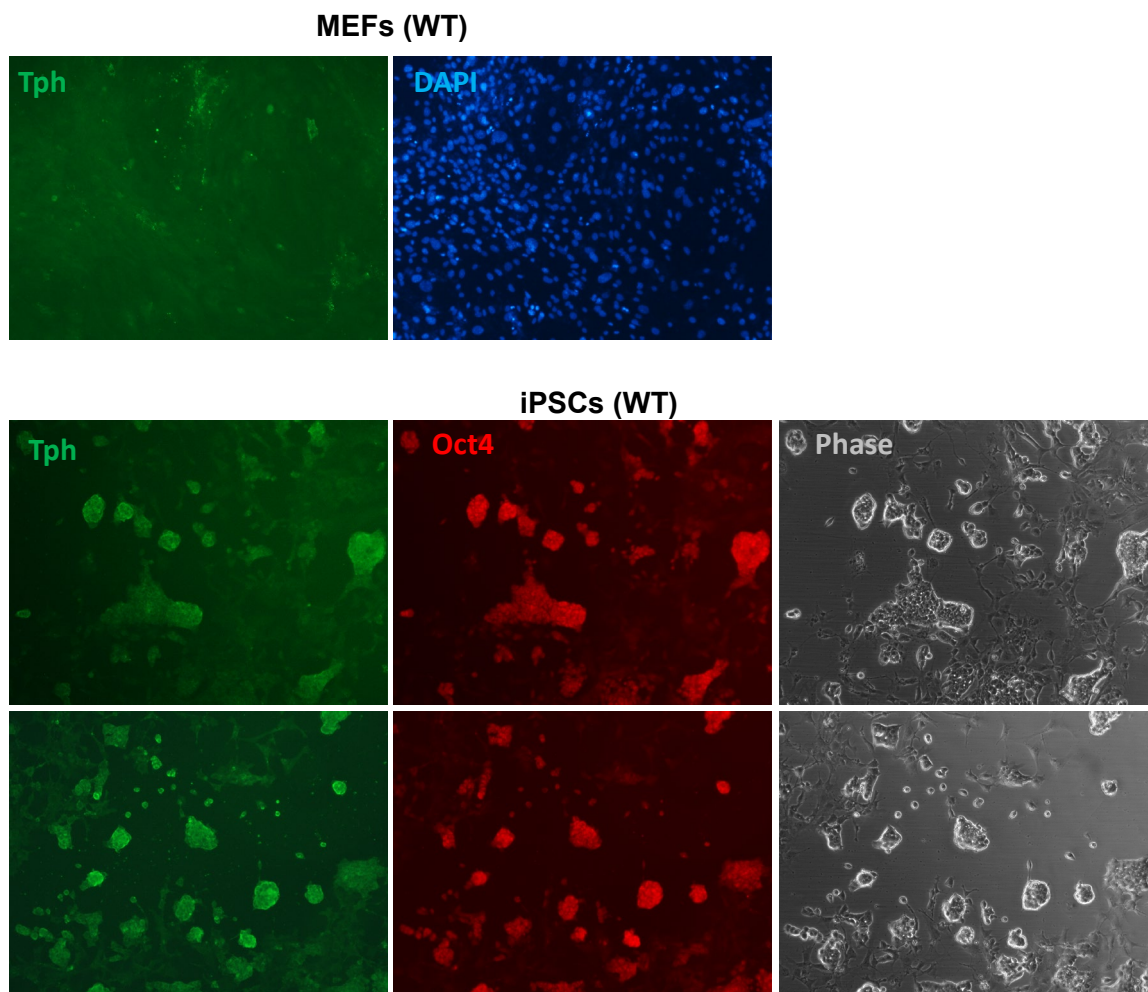

**Supplementary Figure 7. TPH is highly expressed in Oct4-positive iPSC clones and in rare MEFs.** Representative immunostaining of WT MEFs and iPSCs with anti-pan-TPH and Oct4 antibodies.
